# Supplementary material
Source: publisher site journal article supplement (https://www.dovepress.com/article/435201)
Supplement: Supplementary file 1 [file get_supplementary_file.php]

**SUPPLEMENT**

**Supplementary Table 1:** Orlinsky score for dream complexity.

| **Orlinsky Score** | **Dream Description** |
| --- | --- |
| **0** | No dream recall |
| **1** | White dream (the subject remembers having dreamt but cannot remember any specific content) |
| **2** | Subject remembers a specific topic, but in isolation; for example a fragmentary action, scene, object, word, or idea unrelated to anything else |
| **3** | Subject remembers several disconnected thoughts, scenes, or actions |
| **4** | Subject remembers a short but coherent dream, the parts of which seem related to each other; for example a conversation rather than a word, a problem worked through rather than an idea, a purposeful rather than a fragmentary action |
| **5** | Subject remembers a detailed dream sequence in which 2 events or stages occur |
| **6** | Subject remembers a long, detailed dream sequence involving three or four distinct stages of development |
| **7** | Subject remembers an extremely long and detailed dream sequence of five or more stages; or more than one dream (at least one of which is rated 5) for a single awakening |

**Supplementary Table 2*.*** Descriptive statistics of 14 graph speech attributes and word count (uncorrected).

| Graph Speech Attributes | iRBD | | | NREMP | | |
| --- | --- | --- | --- | --- | --- | --- |
|  | Mean | SD | SE | Mean | SD | SE |
| N | 23.43 | 17.71 | 6.69 | 28.15 | 16.35 | 3.66 |
| E | 27.14 | 23.75 | 8.98 | 36.45 | 27.88 | 6.23 |
| RE | 0.71 | 1.50 | 0.57 | 1.80 | 3.94 | 0.88 |
| PE | 1 | 1.53 | 0.58 | 2.1 | 4.12 | 0.92 |
| L1 | 0 | 0 | 0 | 0 | 0 | 0 |
| L2 | 0.29 | 0.76 | 0.29 | 0.3 | 0.92 | 0.21 |
| L3 | 1.14 | 1.57 | 0.6 | 0.45 | 0.89 | 0.2 |
| LCC | 23.43 | 17.71 | 6.69 | 28.15 | 16.35 | 3.66 |
| LSC | 13.86 | 18.47 | 6.98 | 23.4 | 18.01 | 4.03 |
| ATD | 2.08 | 0.39 | 0.15 | 2.35 | 0.49 | 0.11 |
| Density | 0.17 | 0.16 | 0.06 | 0.12 | 0.07 | 0.02 |
| Diameter | 10.71 | 3.86 | 1.46 | 9.05 | 2.33 | 0.52 |
| ASP | 4.34 | 1.34 | 0.51 | 3.87 | 0.78 | 0.17 |
| CC | 0.05 | 0.07 | 0.03 | 0.03 | 0.06 | 0.01 |
| Word Count | 23.43 | 17.71 | 6.69 | 28.15 | 16.35 | 3.66 |

***Abbreviations****:* ATD, Average total distance; ASP, Average shortest path; CC, Clustering coefficient; E, edges; LCC, Largest connected component; LSC, Largest strongly connected component; L1, Cycles of one node; L2, Cycles of two nodes; L3, Cycles of three nodes; N, nodes; NREMP, non-rapid eye movement parasomnia; PE, parallel edges; RBD, rapid eye movement sleep disorder; RE, repeated edges; SD, standard deviation; SE, standard error.

**Supplementary Table 3*.*** Normalised descriptive statistics of SGA attributes (corrected per number of nodes).

| Graph Speech Attributes | iRBD | | | NREMP | | |
| --- | --- | --- | --- | --- | --- | --- |
|  | Mean | SD | SE | Mean | SD | SE |
| E | 1.030 | .179 | .068 | 1.134 | .234 | .052 |
| RE | .020 | .034 | .013 | .037 | .074 | .017 |
| PE | .029 | .037 | .014 | .044 | .076 | .017 |
| L1 | .000 | .000 | .000 | .000 | .000 | .000 |
| L2 | .010 | .025 | .010 | .007 | .018 | .004 |
| L3 | .032 | .046 | .017 | .016 | .035 | .008 |
| LCC | 1.000 | .000 | .000 | .988 | .054 | .012 |
| LSC | .295 | .182 | .069 | .570 | .283 | .063 |
| ATD | .145 | .112 | .042 | .119 | .077 | .017 |
| Density | .024 | .045 | .017 | .012 | .019 | .004 |
| Diameter | .646 | .268 | .101 | .468 | .247 | .055 |
| ASP | .268 | .124 | .047 | .200 | .111 | .025 |
| CC | .002 | .004 | .001 | .002 | .008 | .002 |
| Word Count | 1.123 | .129 | .049 | 1.223 | .222 | .050 |

***Abbreviations****:* ATD, Average total distance; ASP, Average shortest path; CC, Clustering coefficient; E, edges; LCC, Largest connected component; LSC, Largest strongly connected component; L1, Cycles of one node; L2, Cycles of two nodes; L3, Cycles of three nodes; N, nodes; NREMP, non-rapid eye movement parasomnia; PE, parallel edges; iRBD, rapid eye movement sleep disorder; RE, repeated edges; SD, standard deviation; SE, standard error

**Supplementary Table 4.** The Mann-Whitney test results statistics of the comparison between the iRBD and NREMP group of non-parametric graph speech attributes.

| **Attributes** | **iRBD** | | | | **NREMP** | | | | **r** | **η2** | **z** | **p** |
| --- | --- | --- | --- | --- | --- | --- | --- | --- | --- | --- | --- | --- |
| **Mean** | **SE** | **95% BCI lower** | **95 BCI upper** | **Mean** | **SE** | **95% BCI lower** | **95 BCI upper** |
| **WC** | 1.123 | .049 | 1.041 | 1.206 | 1.223 | .050 | 1.135 | 1.321 | .614 | .029 | .885 | .387 |
| **Edges** | 1.030 | .068 | .895 | 1.142 | 1.134 | .052 | 1.038 | 1.232 | .593 | .019 | .719 | .488 |
| **RE** | .020 | .013 | .000 | .046 | .037 | .017 | .011 | .071 | .539 | .003 | .304 | .742 |
| **PE** | .029 | .014 | .008 | .053 | .044 | .017 | .016 | .080 | .507 | .000 | .055 | .975 |
| **L1** | - | - | - | - | - | - | - | - | - | - |  | - |
| **L2** | .010 | .010 | .000 | .029 | .007 | .004 | .000 | .015 | .493 | .000 | -.055 | .964 |
| **L3** | .032 | .017 | .006 | .067 | .016 | .008 | .003 | .033 | .393 | .026 | -.830 | .320 |
| **LCC** | 1.000 | .000 | 1.000 | 1.000 | .988 | .012 | .964 | 1.000 | .475 | .001 | -.194 | .612 |
| **LSC** | **.295** | **.069** | **.176** | **.415** | **.570** | **.063** | **.447** | **.680** | **.779** | **.172** | **2.158** | **.033*** |
| **ATD** | .145 | .042 | .082 | .233 | .119 | .017 | .090 | .155 | .443 | .007 | -.443 | .678 |
| **Density** | .024 | .017 | .004 | .059 | .012 | .004 | .005 | .021 | .443 | .007 | -.443 | .678 |
| **Diameter** | .646 | .101 | .466 | .825 | .468 | .055 | .367 | .572 | .329 | .065 | -1.328 | .193 |
| **ASP** | .268 | .047 | .188 | .350 | .200 | .025 | .155 | .248 | .357 | .045 | -1.107 | .281 |
| **CC** | .002 | .001 | .000 | .005 | .002 | .002 | .000 | .006 | .421 | .014 | -.609 | .503 |

*Notes:* * (in bold) denotes statistically significant differences.

***Abbreviations:*** **ATD**; Average total distance, **ASP**; Average shortest path, **CC**; Clustering Coefficient, **LCC**; Largest Connected Component, **LSC**; Largest strongly connected component, **L1**; Cycles of one node, **L2**; Cycles of two nodes, **L3**; Cycles of three nodes, **NREMP**, non-rapid eye movement parasomnia; **p**; p-value, **PE**; parallel edges, **iRBD;** rapid eye movement sleep disorder, **RE**; repeated edges, **SE;** standard error, **SGA**; Speech Graph Attributes, **WC;** word count, **η2;** effect size, **95% BCI lower;** 95% bootstrap confidence interval lower, **95% BCI upper;** 95% bootstrap confidence interval upper, **r; effect size.**

**Supplementary Figure 1:** Representative speech graphs from iRBD and NREMP patients

**iRBD:**

**
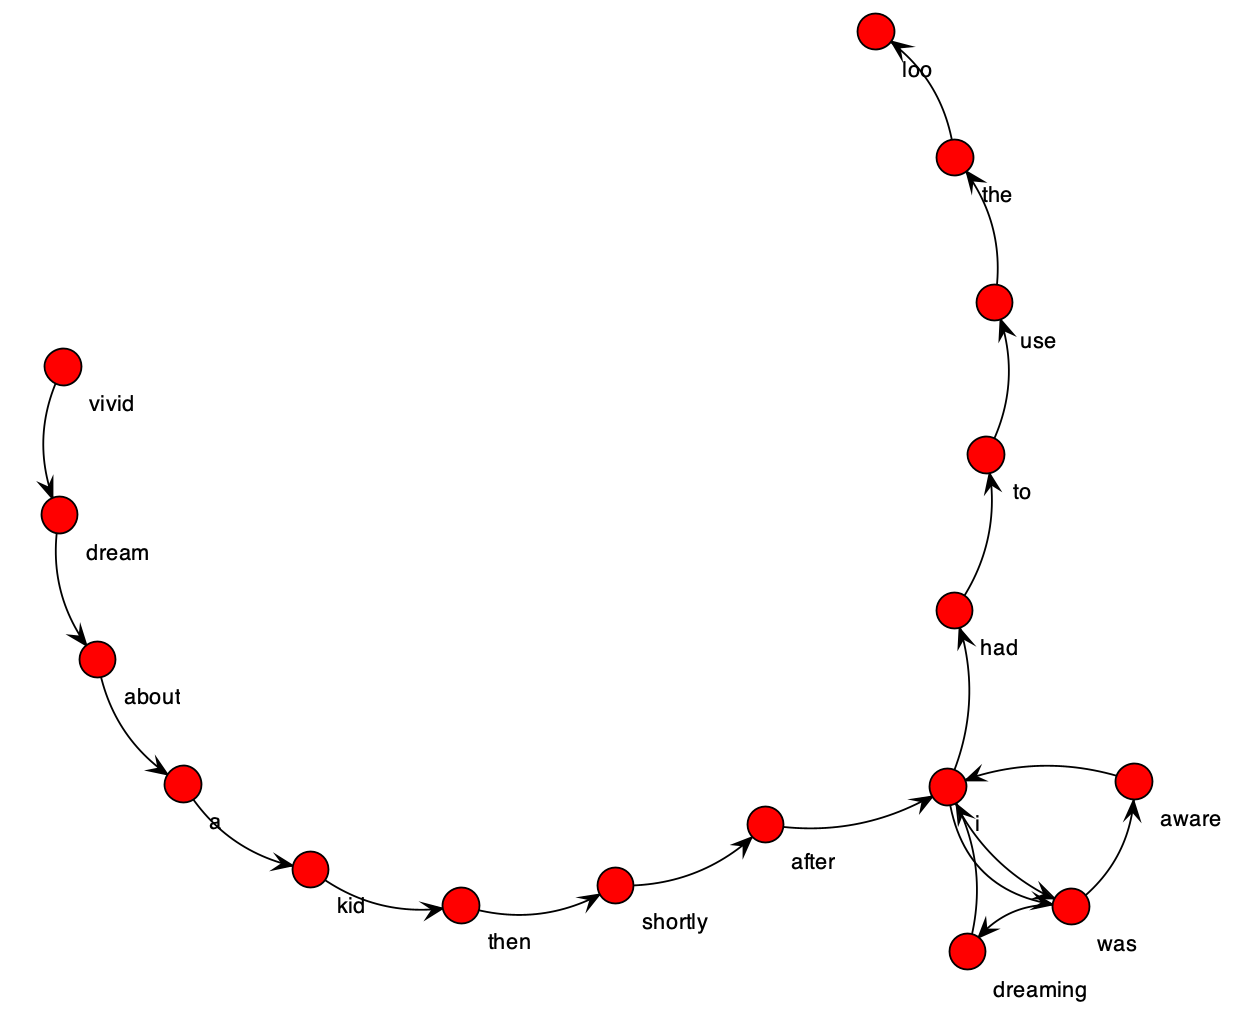
**

**
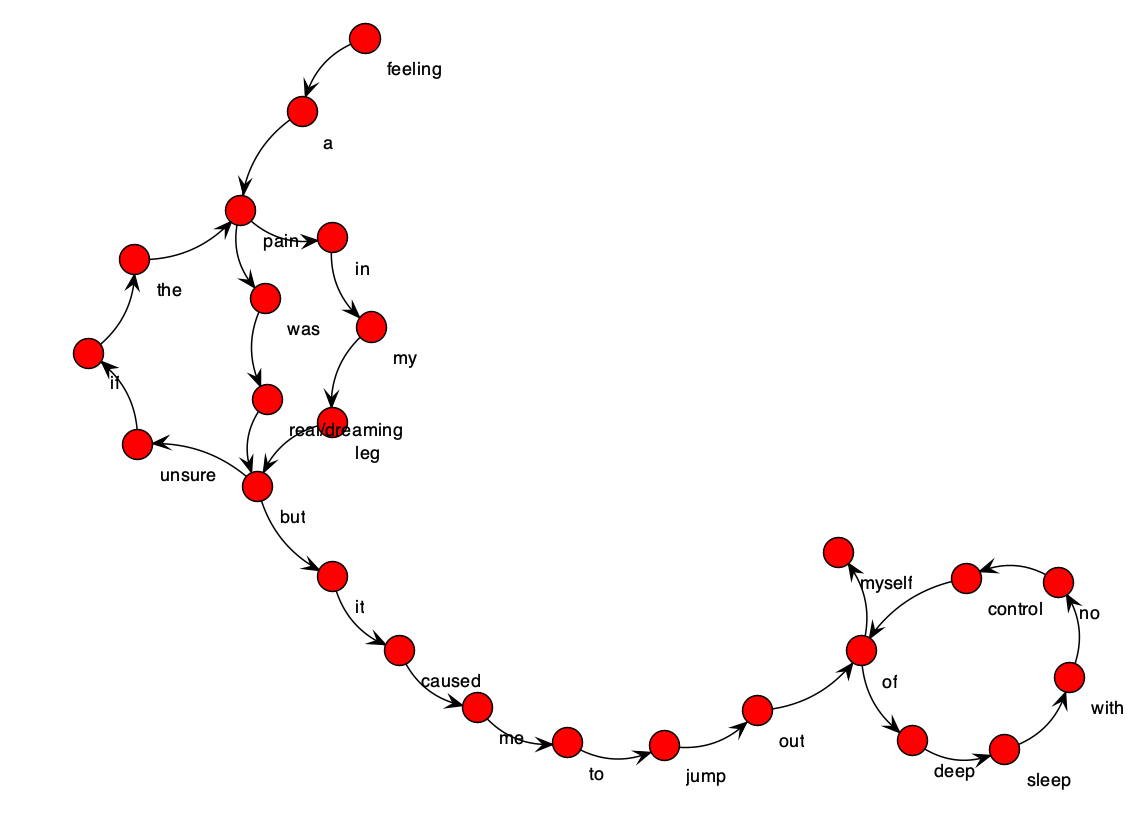
**

**NREMP:**

*
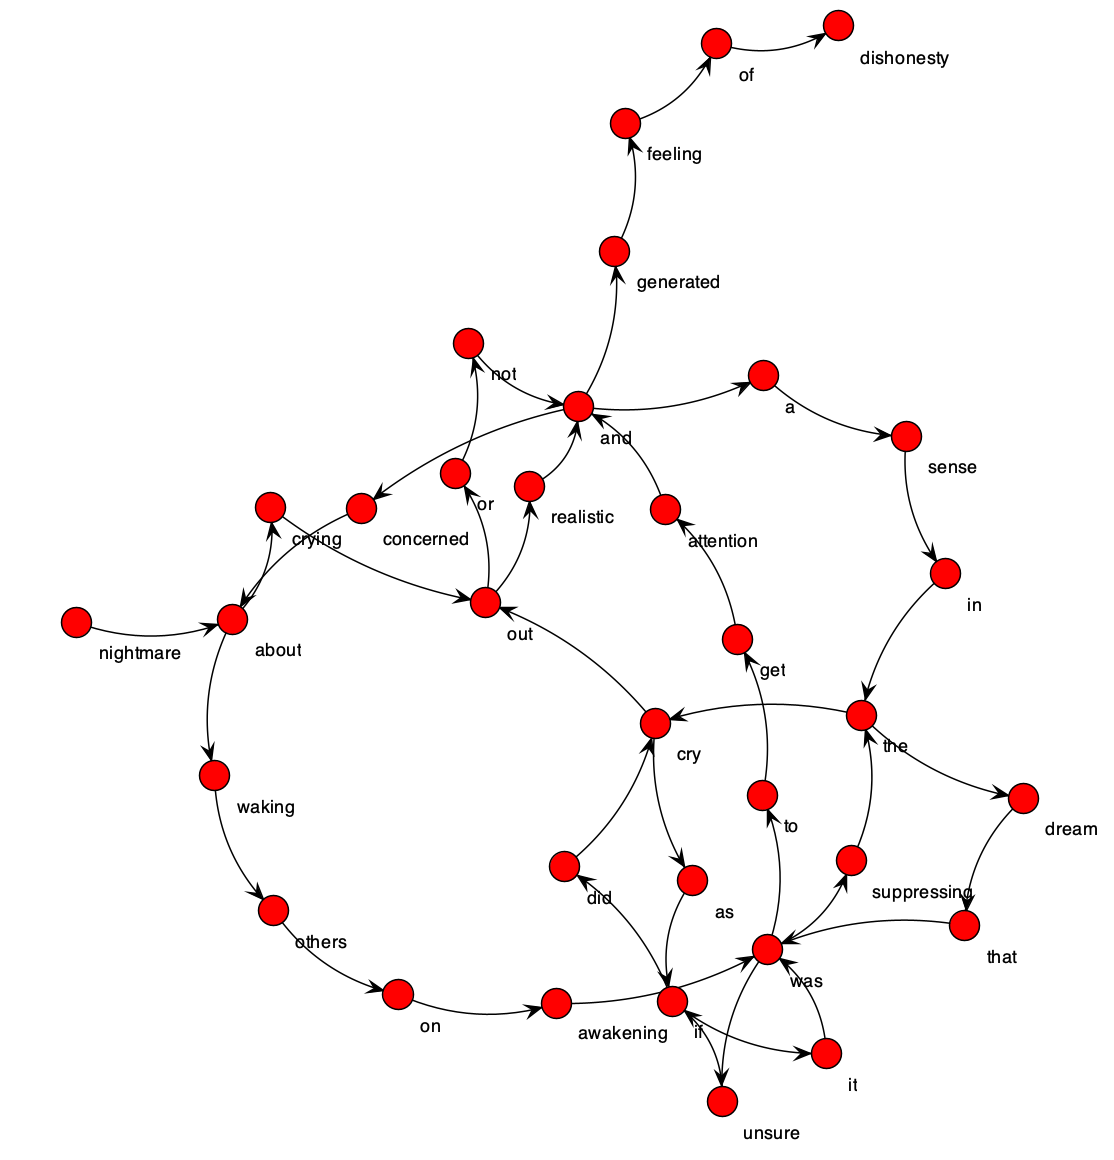
*

*
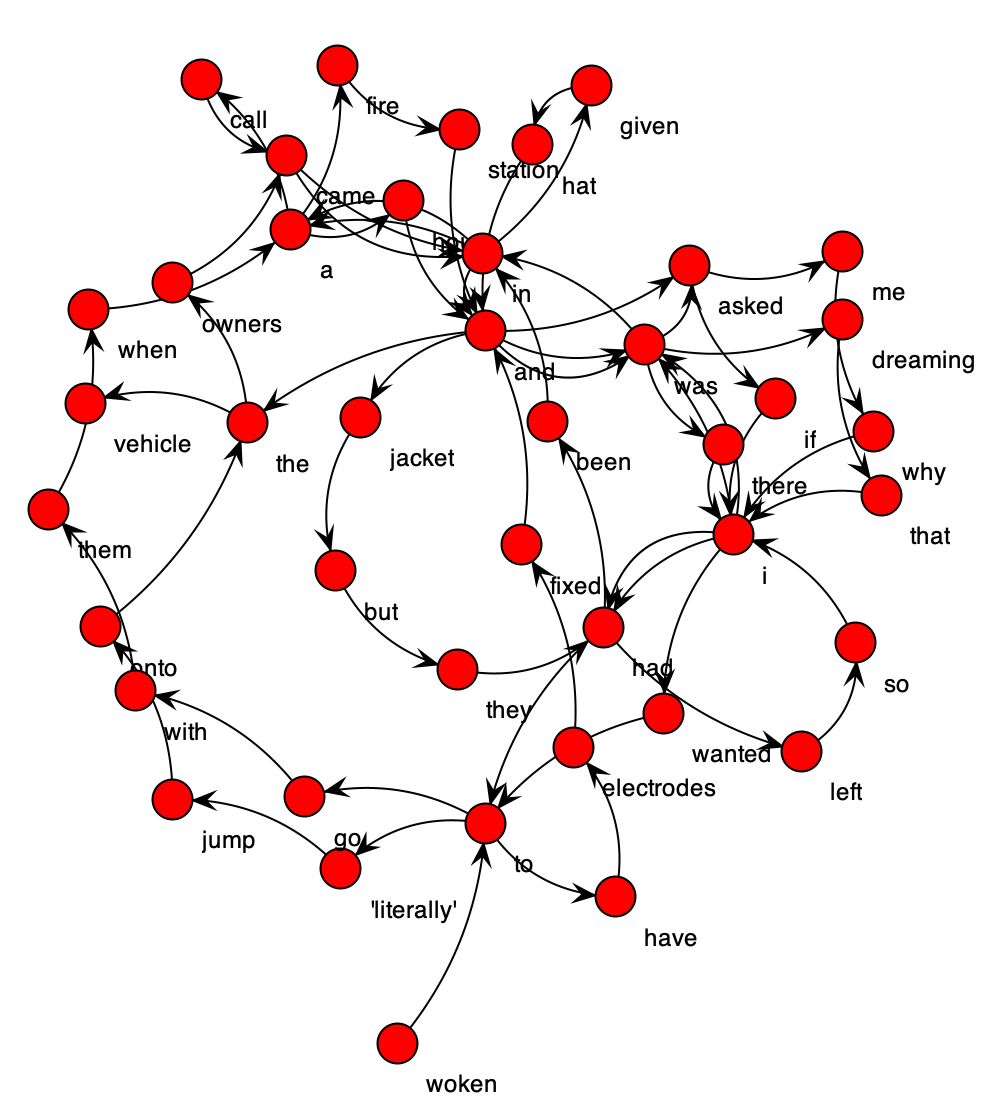
*
